# Supplementary material for: Antibiotic Prescribing in Outpatient Settings: Rural Patients Are More Likely to Receive Fluoroquinolones and Longer Antibiotic Courses
Source: MDPI journal article supplement (doi:10.3390/antibiotics12020224), 2023-01-20
Supplement: s1 [file s1]

**Supplemental Table S1.** Association between rural residence and suboptimal antibiotic use by region.

| Clinical outcomes                     | Rural-residing veterans | Urban-residing veterans | Adjusted odds ratio | Lower confidence interval | Upper confidence interval |
|---------------------------------------|-------------------------|-------------------------|---------------------|---------------------------|---------------------------|
| Fluoroquinolone exposure <sup>a</sup> |                         |                         |                     |                           |                           |
| Northeast                             | 5,860 (16.4%)           | 26,293 (16.5%)          | <b>1.04</b>         | <b>1.01</b>               | <b>1.08</b>               |
| South                                 | 31,588 (20.9%)          | 95,250 (19.0%)          | 1.01                | 0.992                     | 1.03                      |
| Midwest                               | 36,040 (16.7%)          | 16,714 (18.0%)          | <b>1.06</b>         | <b>1.04</b>               | <b>1.09</b>               |
| West                                  | 6,728 (16.5%)           | 32,436 (15.5%)          | 1.03                | 0.999                     | 1.07                      |
| Longer antibiotic course <sup>b</sup> |                         |                         |                     |                           |                           |
| Northeast                             | 18,323 (51.2%)          | 67,605 (42.4%)          | <b>1.36</b>         | <b>1.33</b>               | <b>1.40</b>               |
| South                                 | 79,929 (53%)            | 243,863 (48.8%)         | <b>1.15</b>         | <b>1.13</b>               | <b>1.16</b>               |
| Midwest                               | 51,908 (55.9%)          | 108,871 (50.3%)         | <b>1.21</b>         | <b>1.19</b>               | <b>1.23</b>               |
| West                                  | 22,273 (54.6%)          | 106,084 (50.7%)         | <b>1.14</b>         | <b>1.11</b>               | <b>1.16</b>               |

The data are n (%) or adjusted odds ratio (95% confidence interval). Bold indicates the *p*-value < 0.05 for the comparison of rural and nonrural residence. The adjusted odds ratios were estimated from generalized linear mixed models with a binary distribution and logit link, accounting for clustering by region and year. Longer antibiotic courses were defined as prescriptions with durations of ten days or greater. <sup>a</sup> Adjusted for age, infection diagnosis, cerebrovascular disease, chronic pulmonary disease, hypertension, liver disease, peripheral vascular disease, malignancy, Charlson comorbidity score higher than the median, sex, race, and year. <sup>b</sup> Adjusted for the following: age, infection diagnosis, atherosclerosis, alcohol disorder, cerebrovascular disease, Elixhauser score higher than the median, depression, hypertension, liver disease, myocardial infarction, obesity, malignancy, Hispanic ethnicity, marital status, sex, race, region, and year.
